# Supplementary material for: New Cysteine-Containing PEG-Glycerolipid Increases the Bloodstream Circulation Time of Upconverting Nanoparticles
Source: MDPI journal article supplement (doi:10.3390/molecules27092763), 2022-04-26
Supplement: s1 [file s1]

**New cysteine-containing PEG-glycerolipid increases the bloodstream circulation time of upconverting nanoparticles**

M.E. Nikolaeva, A.V. Nechaev, E.V. Shmendel, R.A. Akasov, M.A. Maslov, A.F. Mironov

Lomonosov Institute of Fine Chemical Technologies, MIREA—Russian Technological University, 86 Vernadsky ave. 119571 Moscow, Russia

Federal Scientific Research Centre “Crystallography and Photonics” of RAS, 59 Leninsky ave., 119333 Moscow

The size and the zeta-potential of the nanoparticles coated with lipid 4 were evaluated using a Zetasizer Nano ZS system (Malvern Panalytica, Malvern, UK) at 25 °C in deionized water (size) and in 10 mM NaCl solution (zeta-potential).

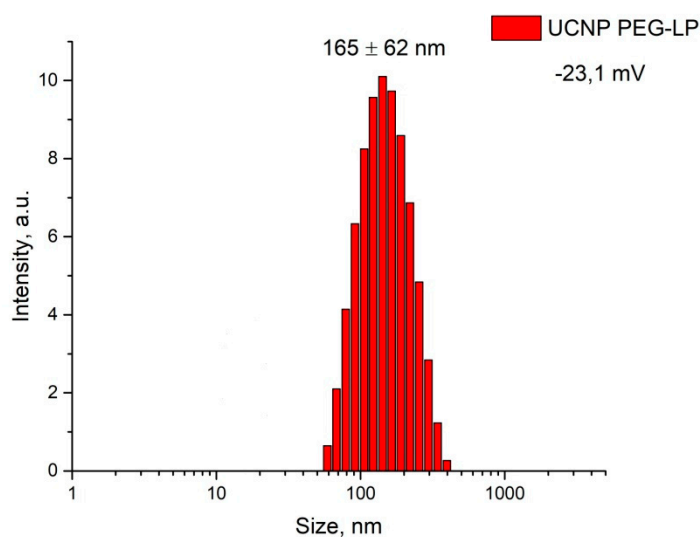

**Figure S1.** Size and zeta potential of nanoparticles coated with PEG-lipid 4.
